# Supplementary material
Source: Springer Nature journal article supplement (https://www.springermedizin.de/resource/supplementary/12961_2009_96_MOESM4_ESM.pdf/9571406)
Supplement: MOESM4 [file 9571406]

**APPLICATION OF AFR  
THE ACTION**

**REACT concept**  
Develop & introduce the framework

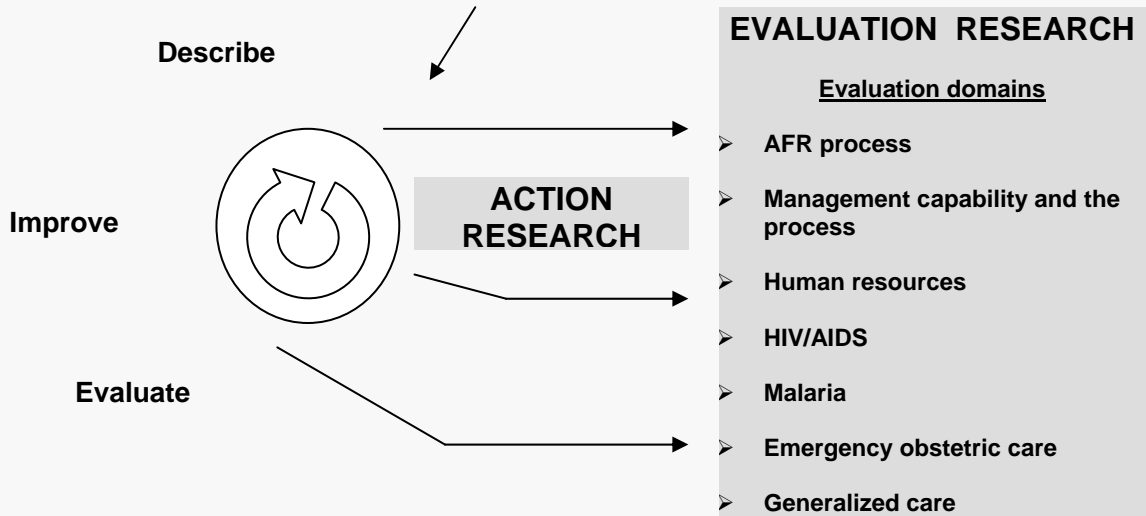

**Three stage research evaluation of AFR:**

1. baseline situation, 2. processes and changes, 3. consequence for quality, equity and trust.  
The action research team facilitates and informs the cyclic action carried out by the district.
